# Supplementary figures and images for: Targeting disialoganglioside GD2 with chimeric antigen receptor-redirected T cells in lung cancer
Source: HighWire-hosted journal article supplement (doi:10.1136/jitc-2021-003897), 2022-01-01

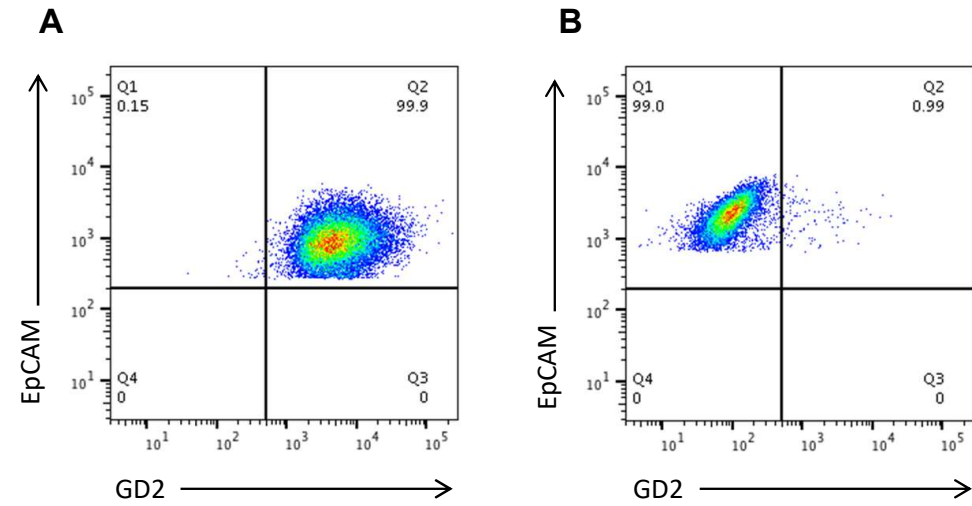

Supplementary figure 2

Supplement: jitc-2021-003897supp003_data_supplement.pdf [file jitc-2021-003897supp003_data_supplement.pdf]
